# Supplementary material
Source: HighWire-hosted journal article supplement (https://bmjmedicine.bmj.com/highwire/filestream/348/field_highwire_adjunct_files/0/bmjmed-2022-000154supp001_data_supplement.pdf)
Supplement: bmjmed-2022-000154supp001_data_supplement.pdf [file bmjmed-2022-000154supp001_data_supplement.pdf]

**Appendix 1:** List of serious adverse event labels considered as MACE in our analyses.; MI: Myocardial Infarction

| <b>Adverse Events</b>              | <b>MACE</b> |
|------------------------------------|-------------|
| Acute coronary syndrome            | <i>MI</i>   |
| Acute myocardial infarction        | <i>MI</i>   |
| Coronary artery occlusion          | <i>MI</i>   |
| Coronary artery thrombosis         | <i>MI</i>   |
| ECG signs of myocardial ischaemia  | <i>MI</i>   |
| Ischaemic cardiomyopathy           | <i>MI</i>   |
| Myocardial infarction              | <i>MI</i>   |
| Myocardial ischaemia               | <i>MI</i>   |
| Myocardial necrosis                | <i>MI</i>   |
| Silent myocardial infarction       | <i>MI</i>   |
| Angina pectoris                    | MI          |
| Angina unstable                    | MI          |
| Anginal equivalent                 | MI          |
| Cardiac arrest                     | MI          |
| Cardiac ventricular disorder       | MI          |
| Cardiac ventricular thrombosis     | MI          |
| Cardio-respiratory arrest          | MI          |
| Coronary arterial stent insertion  | MI          |
| Electrocardiogram Q wave abnormal  | MI          |
| Electrocardiogram ST-T change      | MI          |
| Intracardiac thrombus              | MI          |
| Percutaneous coronary intervention | MI          |
| Vascular stent occlusion           | MI          |
| Ventricular arrhythmia             | MI          |
| Ventricular tachycardia            | MI          |

|                                                                     |               |
|---------------------------------------------------------------------|---------------|
| Basal ganglia infarction                                            | <i>STROKE</i> |
| Basilar artery occlusion                                            | <i>STROKE</i> |
| Brain stem infarction                                               | <i>STROKE</i> |
| Brain stem stroke                                                   | <i>STROKE</i> |
| Carotid artery occlusion                                            | <i>STROKE</i> |
| Cerebellar infarction                                               | <i>STROKE</i> |
| Cerebral infarction                                                 | <i>STROKE</i> |
| Cerebral ischaemia                                                  | <i>STROKE</i> |
| Cerebral small vessel ischaemic disease                             | <i>STROKE</i> |
| Cerebrovascular accident                                            | <i>STROKE</i> |
| Embolic stroke                                                      | <i>STROKE</i> |
| Haemorrhagic stroke                                                 | <i>STROKE</i> |
| Ischaemic cerebral infarction                                       | <i>STROKE</i> |
| Ischaemic stroke                                                    | <i>STROKE</i> |
| Lacunar infarction                                                  | <i>STROKE</i> |
| Lacunar stroke                                                      | <i>STROKE</i> |
| Thalamic infarction                                                 | <i>STROKE</i> |
| Transient ischaemic attack                                          | <i>STROKE</i> |
| Brain stem haemorrhage                                              | STROKE        |
| Cerebellar haemorrhage                                              | STROKE        |
| Cerebral haematoma                                                  | STROKE        |
| Cerebral haemorrhage                                                | STROKE        |
| Haemorrhage intracranial                                            | STROKE        |
| Death [Related to “Cardiac disorder” or “vascular disorder”]        | DEATH         |
| Sudden Death [Related to “Cardiac disorder” or “vascular disorder”] | DEATH         |
